# Supplementary material for: Synthesis of gallic acid-grafted epoxidized natural rubber and its role in self-healable flexible temperature sensors
Source: Royal Society of Chemistry journal article supplement (doi:10.1039/d3sm01367g), 2023-11-27
Supplement: d3sm01367g1.pdf [file d3sm01367g1.pdf]

### Electronic supplementary information (ESI)

## Synthesis of Gallic Acid Grafted Epoxidized Natural Rubber and its Role in Self-Healable Flexible Temperature Sensor

Aparna Guchait, Simran Sharma, Santanu Chattopadhyay\*, Titash Mondal\*

*Rubber Technology Centre, Indian Institute of Technology Kharagpur, Kharagpur, India-721302*

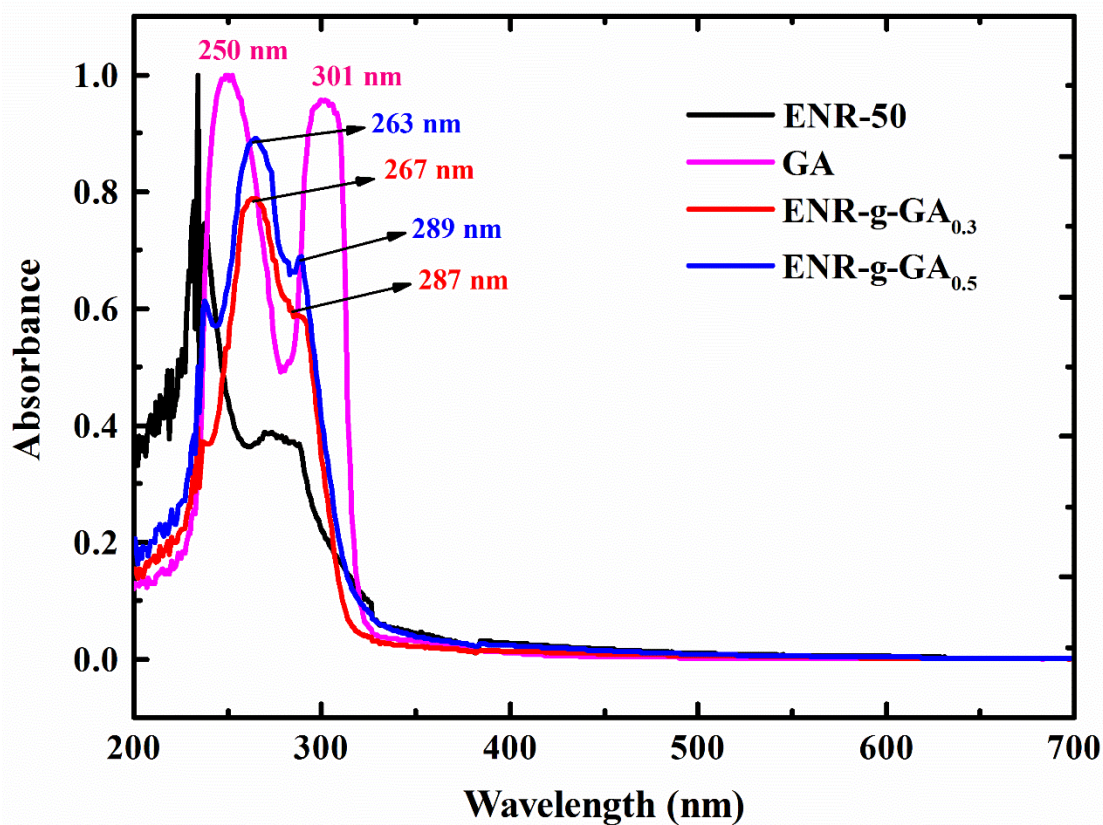

Fig. S1: UV-vis spectra of unmodified ENR-50, GA, and ENR-g-GA.

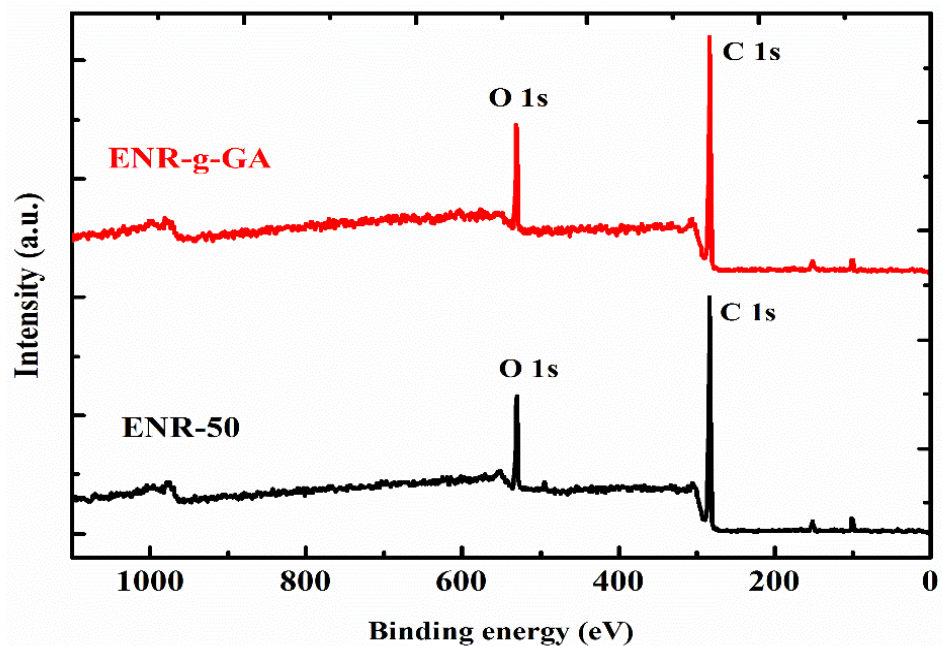

Fig. S2: XPS survey scan of pristine ENR-50 and ENR-g-GA

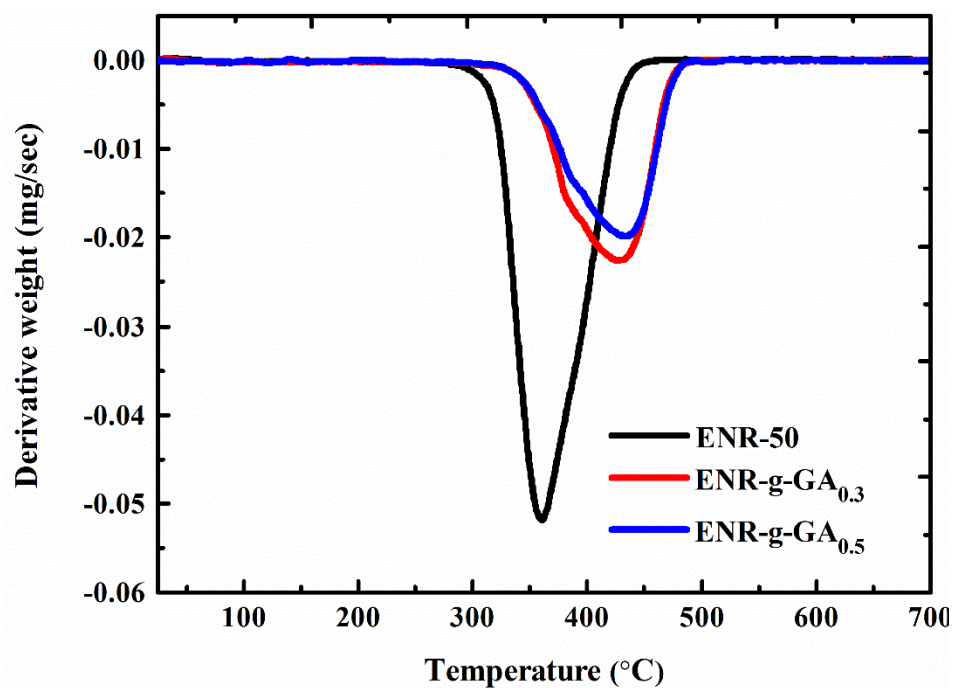

Fig. S3: DTG thermogram of ENR-50 and ENR-g-GA.

**Table S1: Thermal degradation of ENR, ENR-g-GA<sub>0.3</sub>, ENR-g-GA<sub>0.5</sub>**

| Sample Name             | T <sub>10</sub> (°C) | T <sub>50</sub> (°C) | T <sub>90</sub> (°C) | Residue (%) |
|-------------------------|----------------------|----------------------|----------------------|-------------|
| ENR-50                  | 336                  | 367                  | 407                  | 1.9         |
| ENR-g-GA <sub>0.3</sub> | 365                  | 414                  | 451                  | 0.3         |
| ENR-g-GA <sub>0.5</sub> | 365                  | 417                  | 454                  | 0.2         |

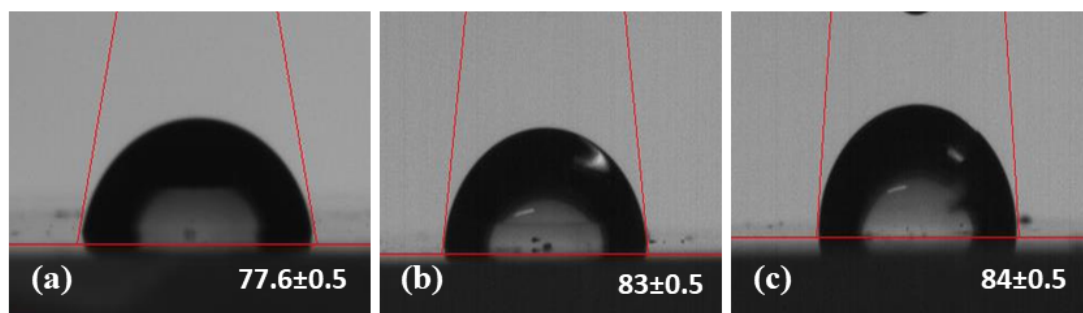

**Fig. S4:** Contact angle of pristine ENR-50 (a), ENR-g-GA<sub>0.3</sub> (b) and ENR-g-GA<sub>0.5</sub> (c)

**Table S2:** Contact angle and work of adhesion value for pristine ENR-50, ENR-g-GA<sub>0.3</sub> and ENR-g-GA<sub>0.5</sub>

| Parameter                           | Purified ENR-50 | ENR-g-GA <sub>0.3</sub> | ENR-g-GA <sub>0.5</sub> |
|-------------------------------------|-----------------|-------------------------|-------------------------|
| Contact angle (°)                   | 77.6 ± 0.5      | 83 ± 0.5                | 84 ± 0.5                |
| W <sub>SL</sub> (J/m <sup>2</sup> ) | 88.36           | 80.7                    | 79.5                    |

**Table S3:** Tensile strength and elongation value of the sample.

| Sample name                             | Tensile strength (MPa) | Elongation at Break (%) |
|-----------------------------------------|------------------------|-------------------------|
| $\text{ENR}/\text{Fe}_{0.02}^{3+}$      | $2.73 \pm 0.25$        | $748 \pm 37$            |
| $\text{ENR-g-GA}/\text{Fe}_{0.02}^{3+}$ | $4.42 \pm 0.13$        | $667 \pm 25$            |
| $\text{ENR}/\text{Fe}_{0.05}^{3+}$      | $3.71 \pm 0.05$        | $561 \pm 97$            |
| $\text{ENR-g-GA}/\text{Fe}_{0.05}^{3+}$ | $6.5 \pm 0.34$         | $451 \pm 54$            |
| $\text{ENR}/\text{Fe}_{0.10}^{3+}$      | $5.1 \pm 0.23$         | $470 \pm 59$            |
| $\text{ENR-g-GA}/\text{Fe}_{0.10}^{3+}$ | $19.6 \pm 0.33$        | $248 \pm 13$            |
| $\text{ENR}/\text{Fe}_{0.15}^{3+}$      | $8.5 \pm 0.85$         | $429 \pm 13$            |
| $\text{ENR-g-GA}/\text{Fe}_{0.15}^{3+}$ | $14.8 \pm 0.58$        | $12 \pm 2.2$            |

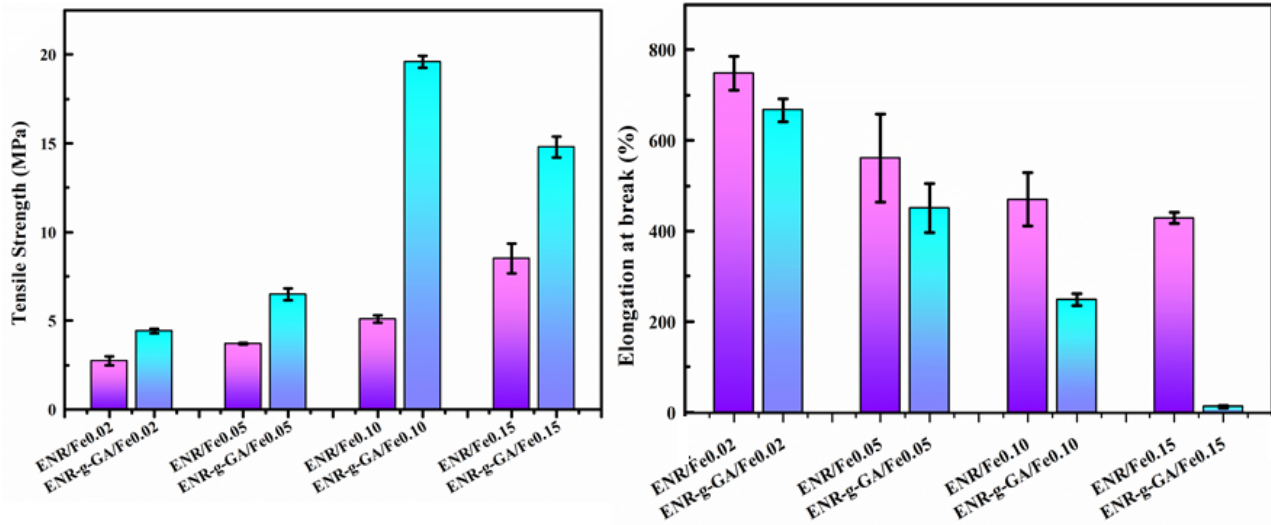

**Fig. S5:** Tensile strength and elongation at break.

**Table S4:** Tensile strength of ENR-g-GA/Fe with different Fe<sup>3+</sup> content and CNT filled ENR-g-GA/Fe with different CNT loading.

| Sample                                        | Tensile strength (MPa) | EAB | Efficiency of tensile strength | Efficiency of EAB |
|-----------------------------------------------|------------------------|-----|--------------------------------|-------------------|
| ENR-g-GA/Fe <sub>0.02</sub> <sup>3+</sup>     | 4.42                   | 667 |                                |                   |
| ENR-g-GA/Fe <sub>0.02</sub> <sup>3+</sup> H   | 1.90                   | 323 | 42.9%                          | 48.4%             |
| ENR-g-GA/Fe <sub>0.05</sub> <sup>3+</sup>     | 6.5                    | 451 |                                |                   |
| ENR-g-GA/Fe <sub>0.05</sub> <sup>3+</sup> H   | 1.57                   | 118 | 24.1%                          | 26.1%             |
| ENR-g-GA/Fe <sub>0.10</sub> <sup>3+</sup>     | 19.59                  | 248 |                                |                   |
| ENR-g-GA/Fe <sub>0.10</sub> <sup>3+</sup> H   | 1.33                   | 87  | 6.7%                           | 35%               |
| ENR-g-GAC2/Fe <sub>0.02</sub> <sup>3+</sup>   | 3.2                    | 617 |                                |                   |
| ENR-g-GAC2/Fe <sub>0.02</sub> <sup>3+</sup> H | 1.0                    | 146 | 31.2%                          | 23.6%             |

**Table S5:** Temperature sweep

|                                           | Temperature (° C) | Tan delta |
|-------------------------------------------|-------------------|-----------|
| ENR/Fe <sub>0.10</sub> <sup>3+</sup>      | -4.5              | 0.508     |
| ENR-g-GA/Fe <sub>0.02</sub> <sup>3+</sup> | 11.75             | 1.27      |
| ENR-g-GA/Fe <sub>0.05</sub> <sup>3+</sup> | 14.99             | 0.687     |
| ENR-g-GA/Fe <sub>0.15</sub> <sup>3+</sup> | 20.8              | 0.583     |

**Table S6:** Frequency sweep

|                                           | Log frequency | Log E', E'' |
|-------------------------------------------|---------------|-------------|
| ENR/Fe <sub>0.10</sub> <sup>3+</sup>      | -1.85         | 6.12        |
| ENR-g-GA/Fe <sub>0.05</sub> <sup>3+</sup> | -1.64         | 6.257       |
| ENR-g-GA/Fe <sub>0.10</sub> <sup>3+</sup> | -1.44         | 6.287       |

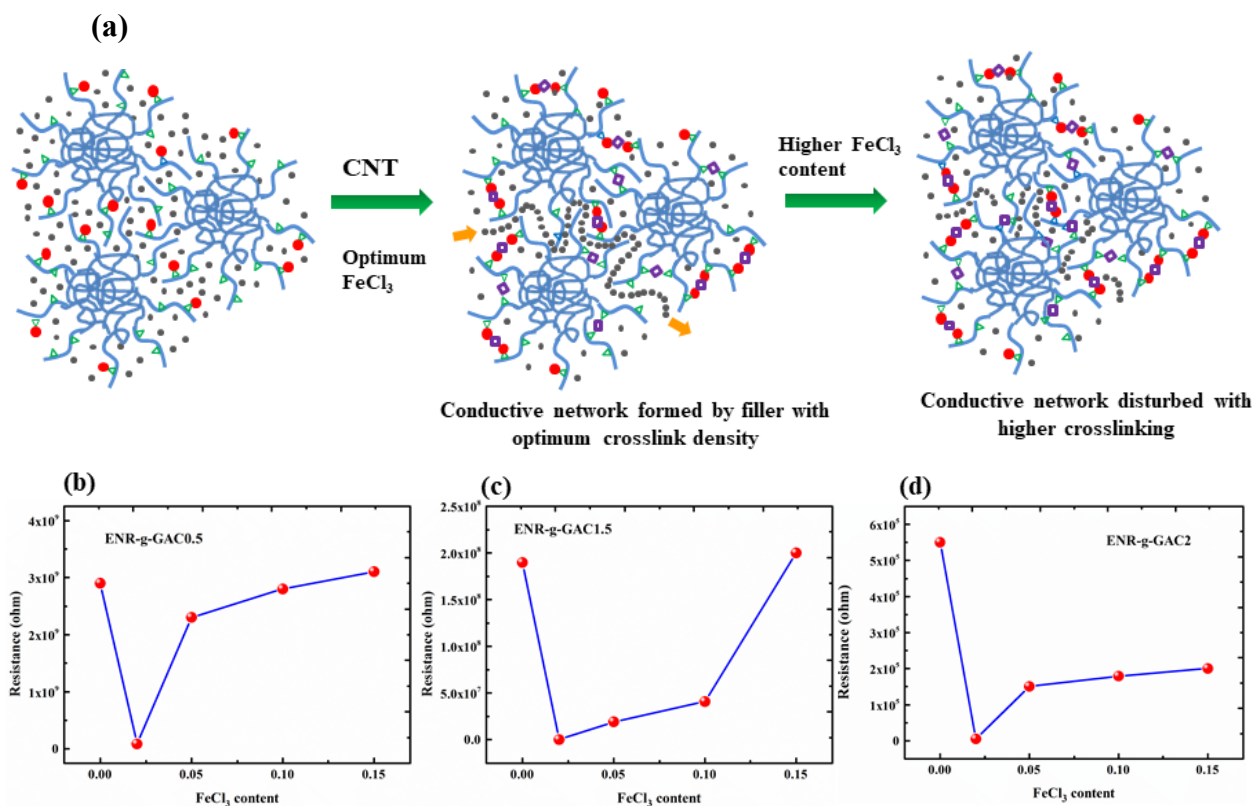

**Fig. S6:** (a) Schematic representation of effect of conductivity with  $\text{FeCl}_3$  content. Resistance vs  $\text{FeCl}_3$  content for ENR-g-GAC0.5 (CNT content 0.5%) (b), ENR-g-GAC1.5 (CNT content 1.5%) (c), ENR-g-GAC2 (CNT content 2%) (e).

Figure S6a demonstrated the schematic diagram of effect of crosslink (with respect to  $\text{FeCl}_3$  content) on the conductivity. Figure S6(b-d) represent the resistance value of the composite film with varying  $\text{FeCl}_3$  content for CNT loading of 0.5%, 1.5%, 2%. All this figure showed a decrease in resistance for  $\text{FeCl}_3$  0.02, then increases with increasing amount of  $\text{FeCl}_3$ . This can be explained by the fact that, at an optimum  $\text{FeCl}_3$  content, the conductive filler particles are forced to come in a close proximity. Therefore, a small amount of  $\text{FeCl}_3$  form a conductive filler network which reduced the resistance of the composite film. However, with increasing  $\text{FeCl}_3$  content the filler particles are bound in small area due to the increase in crosslink density, which imparts disconnect in the filler network. Therefore, with increasing  $\text{FeCl}_3$  beyond an optimal value the resistance value increases.

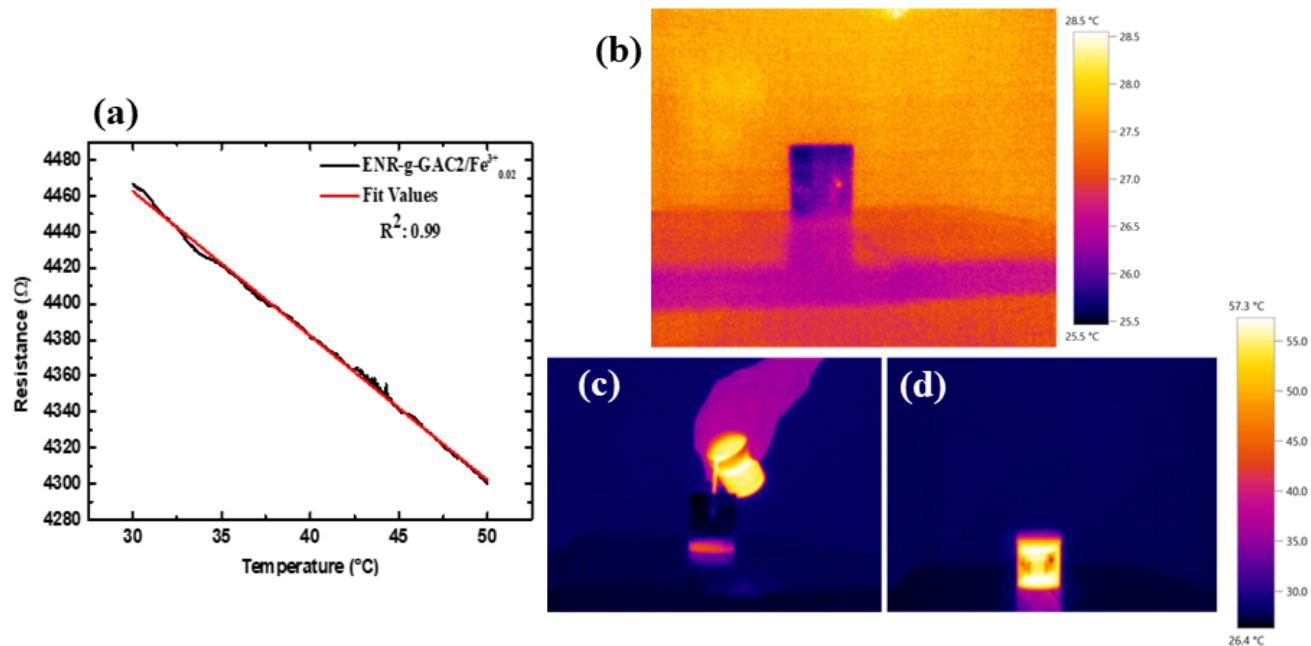

Fig. S7: (a) resistance vs temperature plot, (b-d) thermal camera image

Table S7: Tensile strength of the sensor and the heated sensor sample.

| Sample                        | Tensile strength (MPa) | EAB | Efficiency of tensile strength | Efficiency of EAB |
|-------------------------------|------------------------|-----|--------------------------------|-------------------|
| ENR-g-GAC2/ $Fe_{0.02}^{3+}$  | 3.2                    | 617 |                                |                   |
| ENR-g-GAC2/ $Fe_{0.02}^{3+}H$ | 1.0                    | 146 | 31.2%                          | 23.6%             |
